# Supplementary material for: Expression Quantitative Trait Loci for Extreme Host Response to Influenza A in Pre-Collaborative Cross Mice
Source: PubMed Central journal article supplement (PMC3284329; doi:10.1534/g3.111.001800), 2012-02-01
Supplement: supp_2.2.213_001800SI.pdf [file supp_2.2.213_001800SI.pdf]

A.

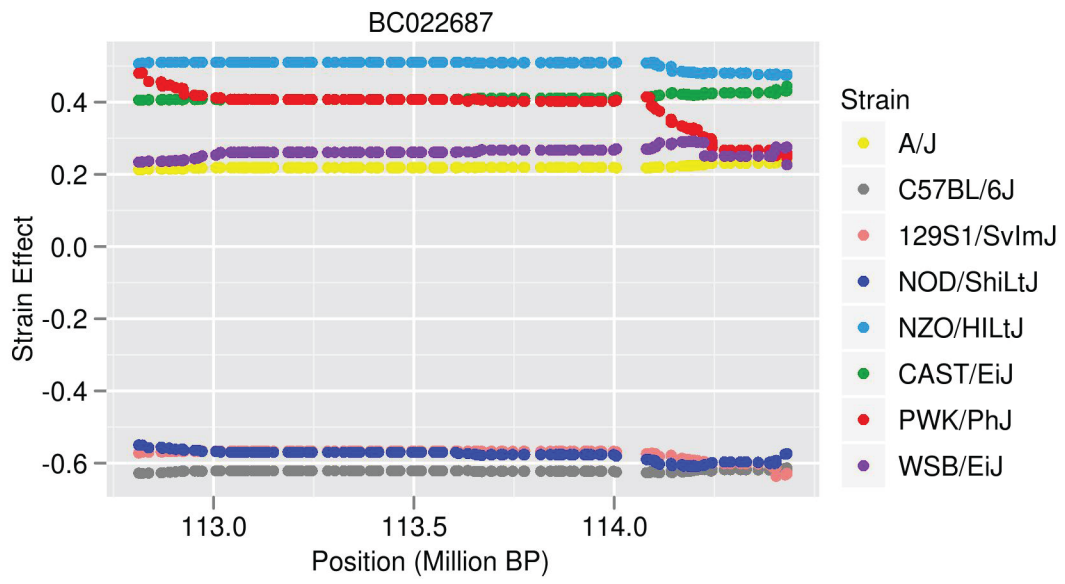

B.

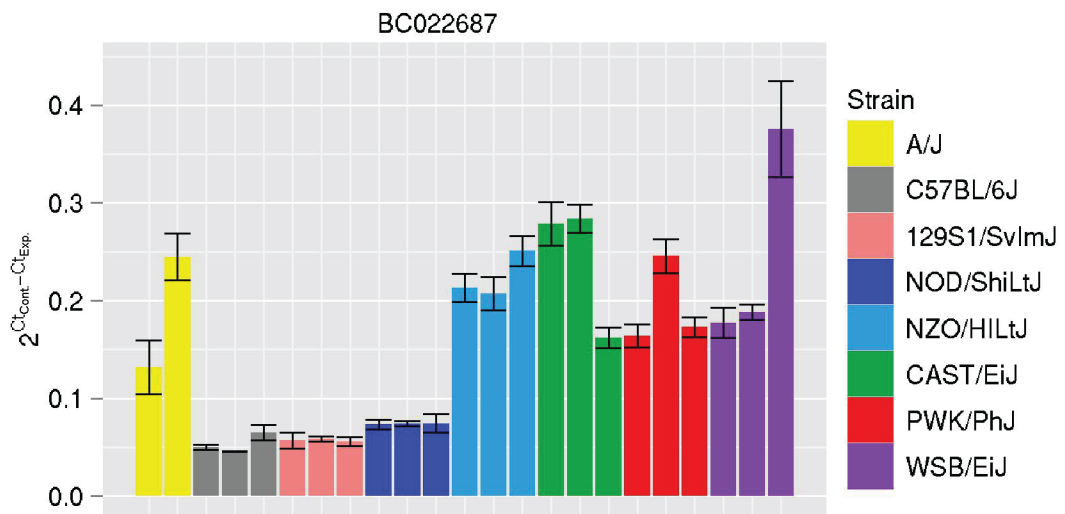

Figure S1

A.

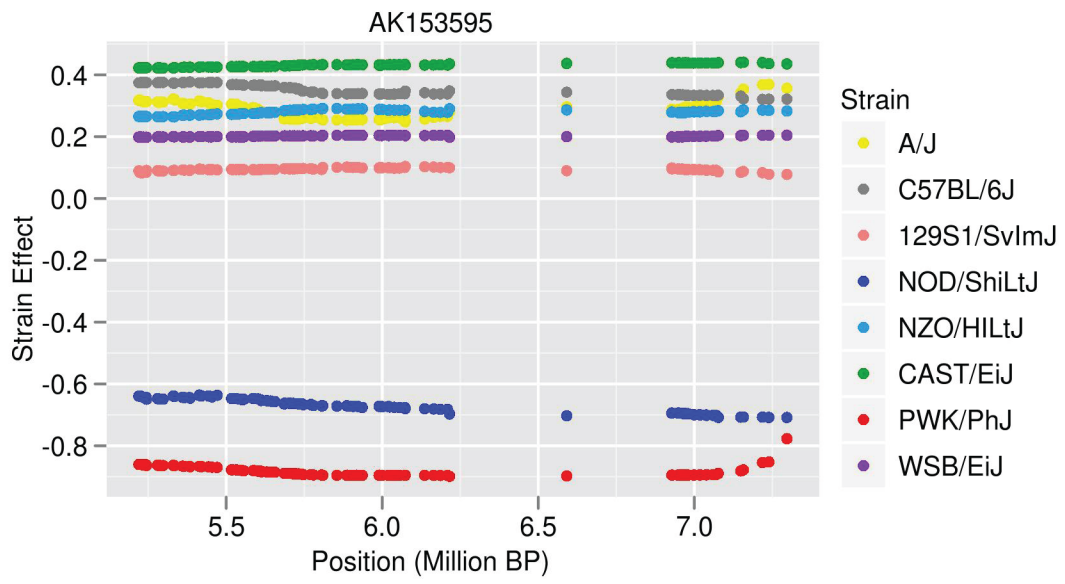

B.

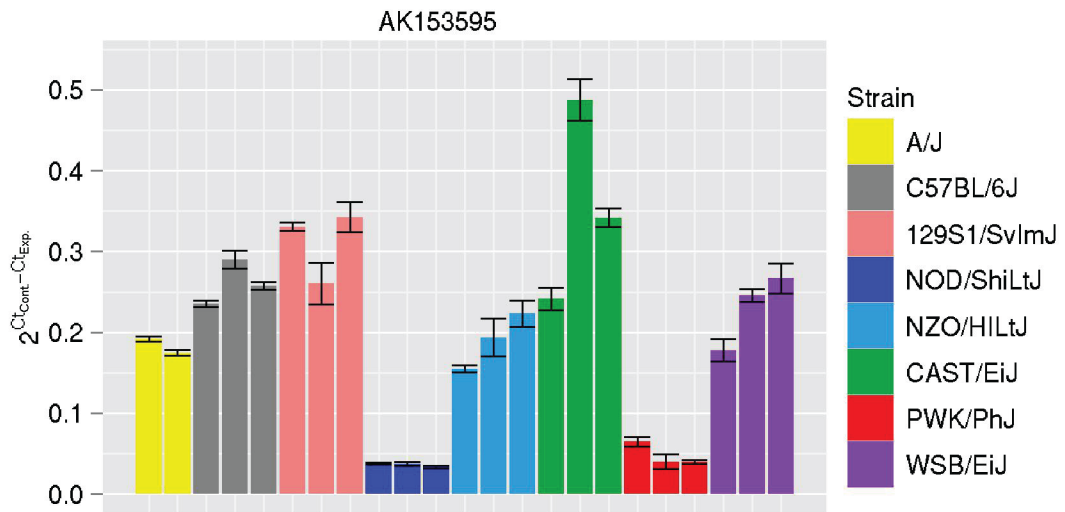

Figure S2

A.

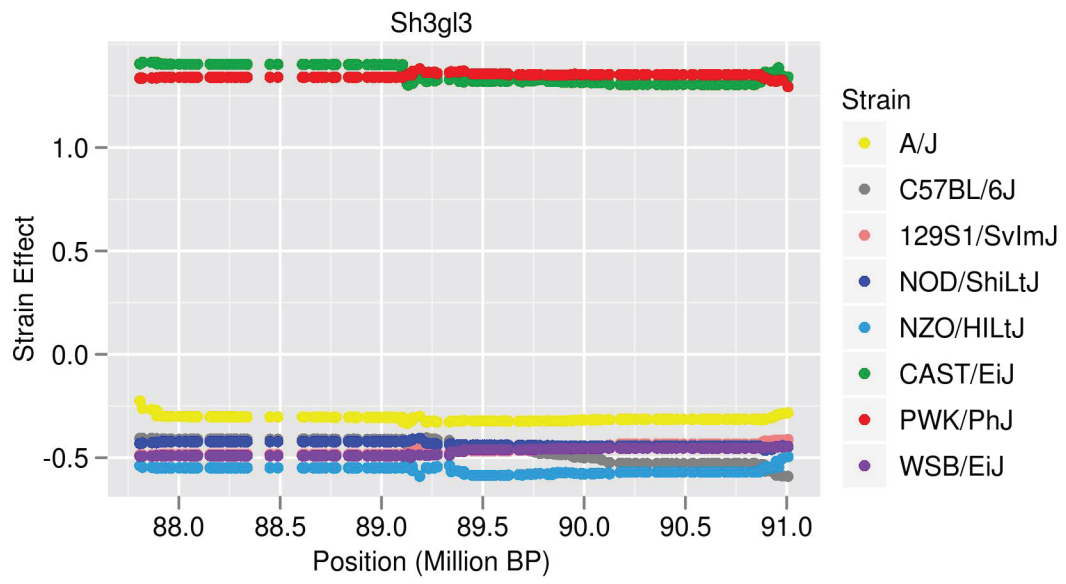

B.

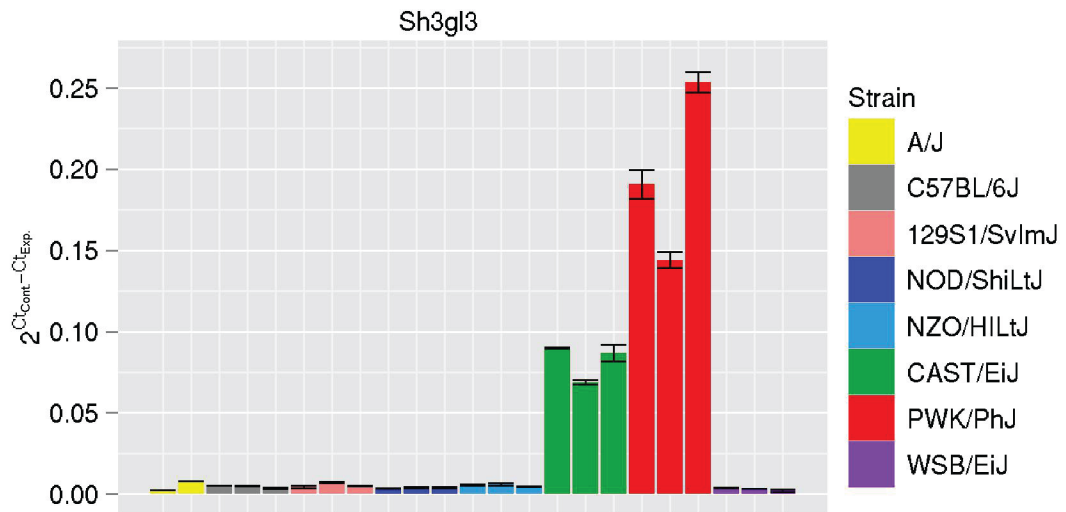

Figure S3

A.

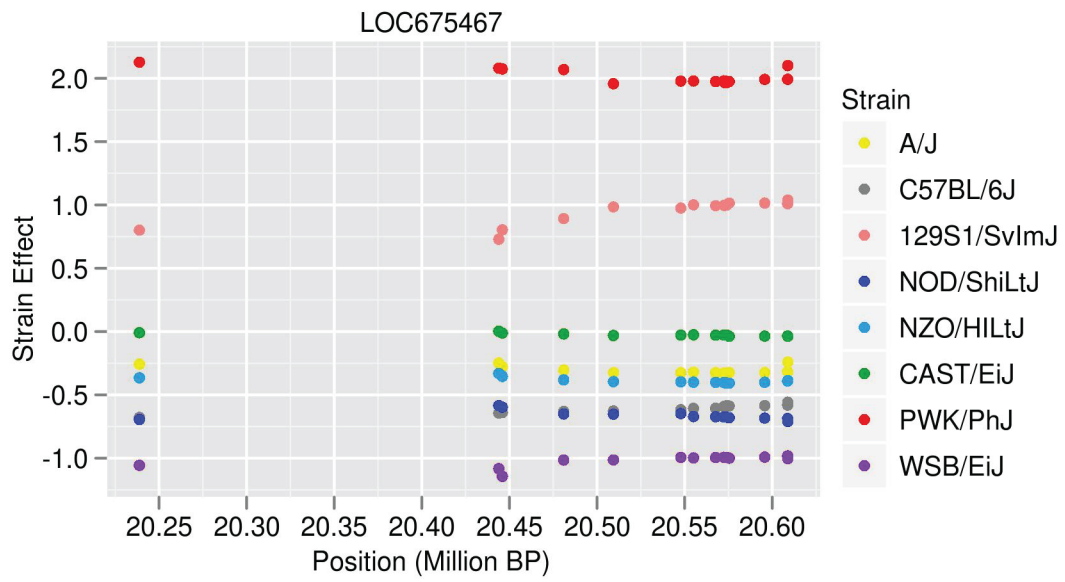

B.

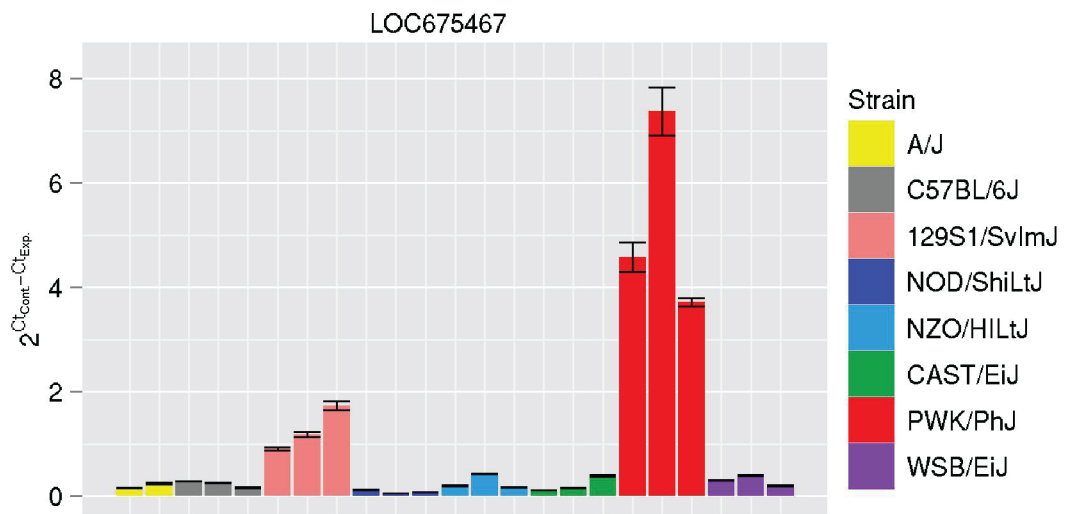

Figure S4

A.

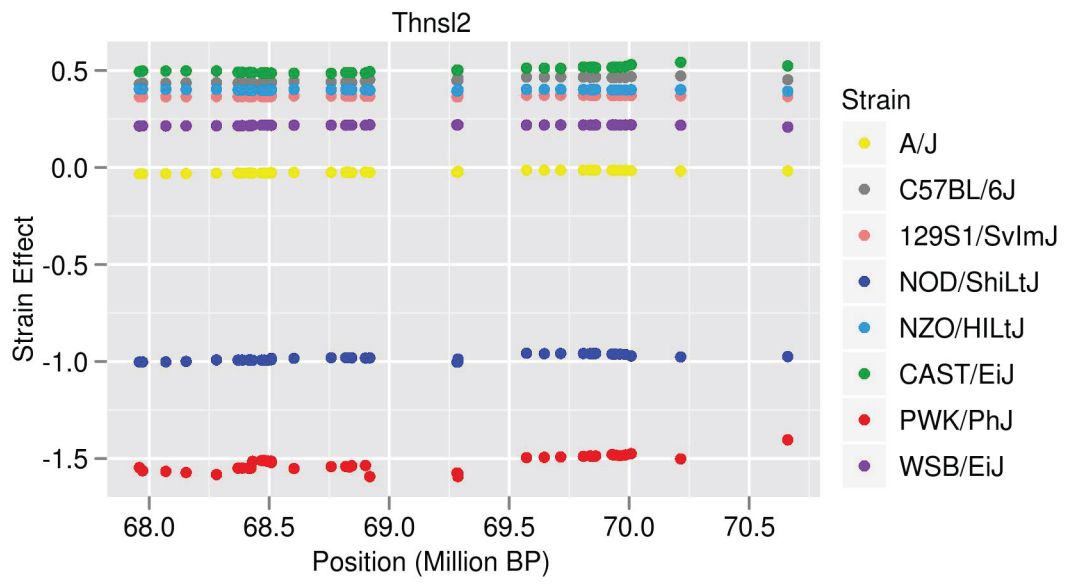

B.

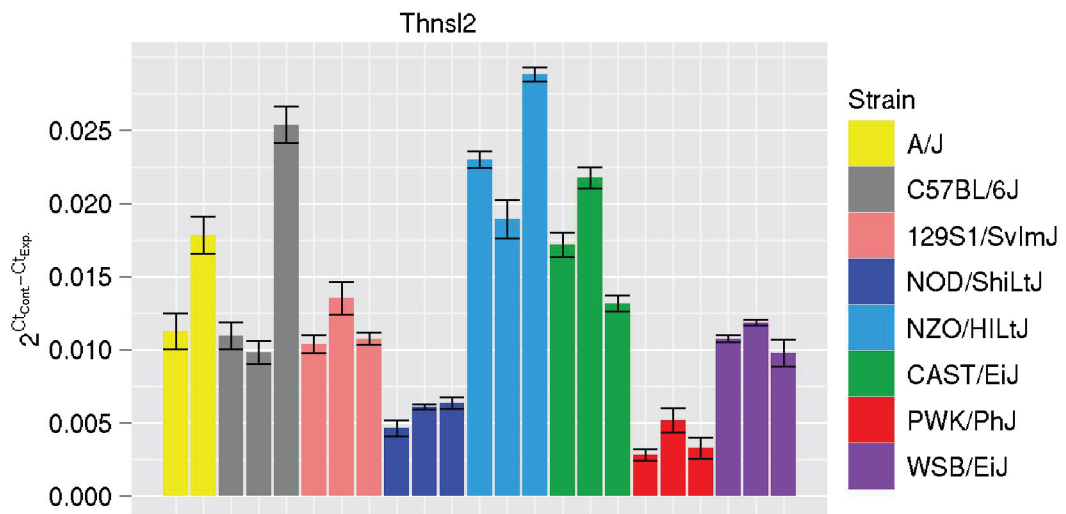

Figure S5

A.

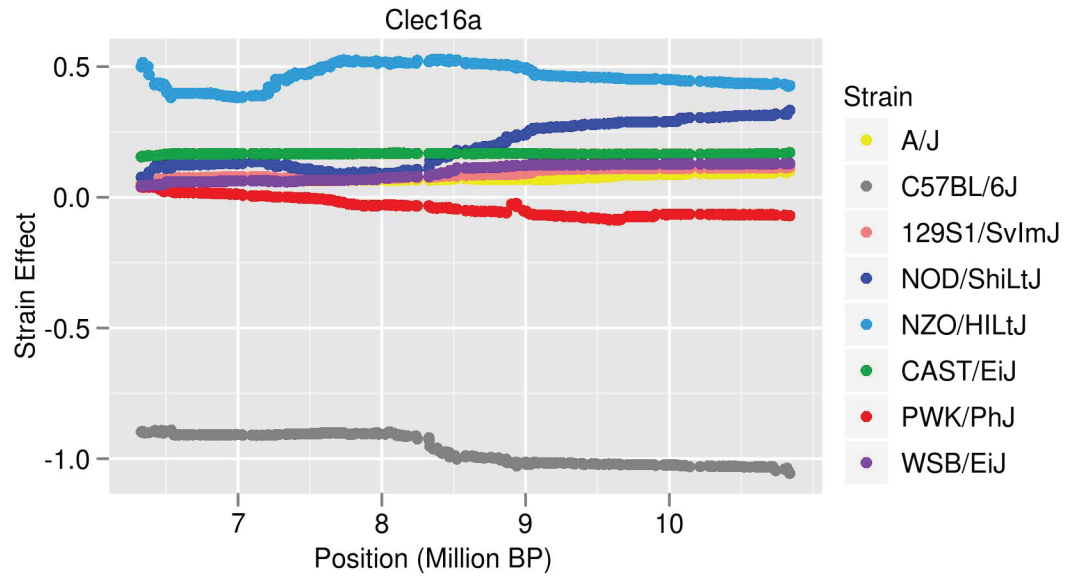

B.

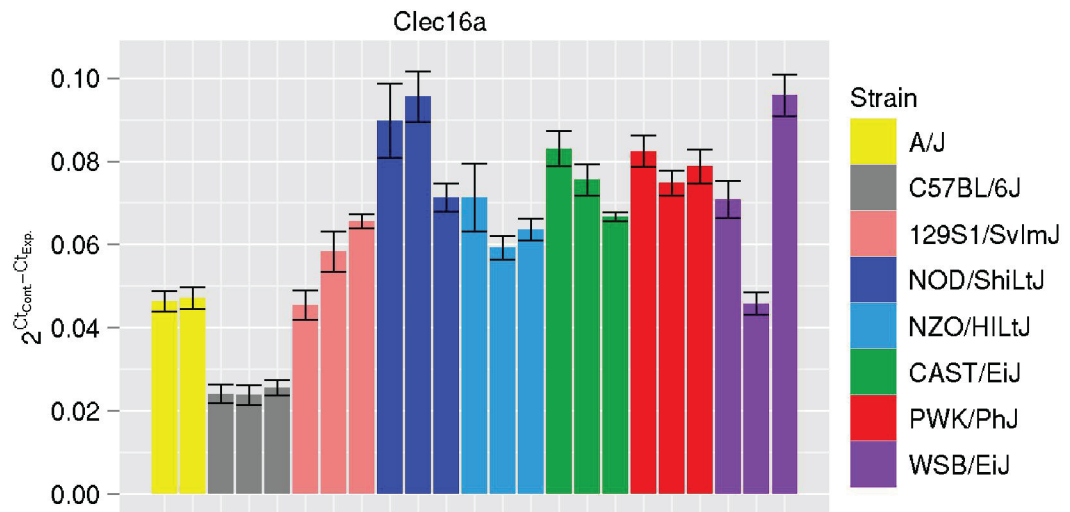

Figure S6

A.

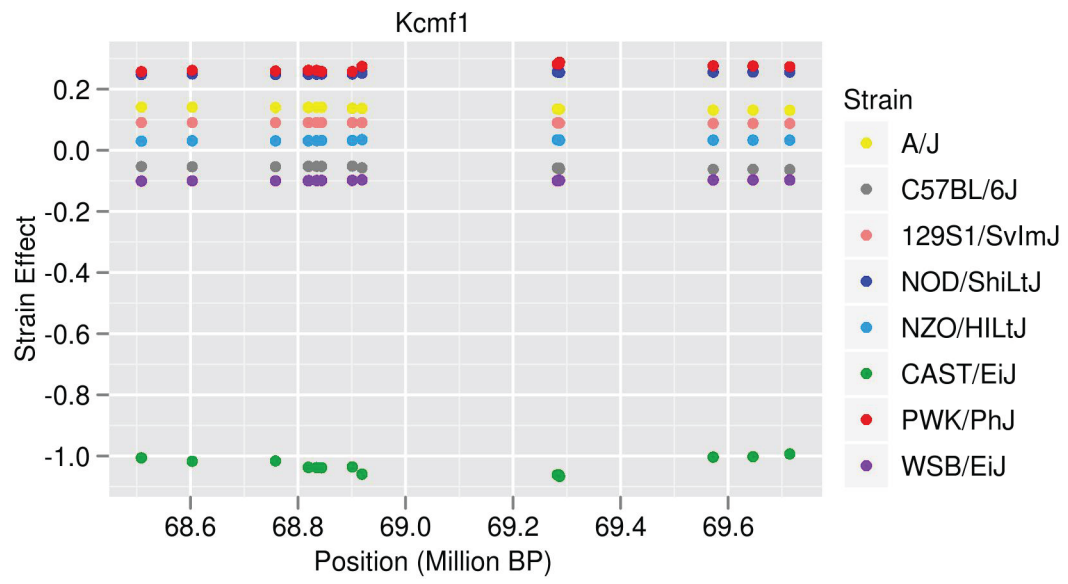

B.

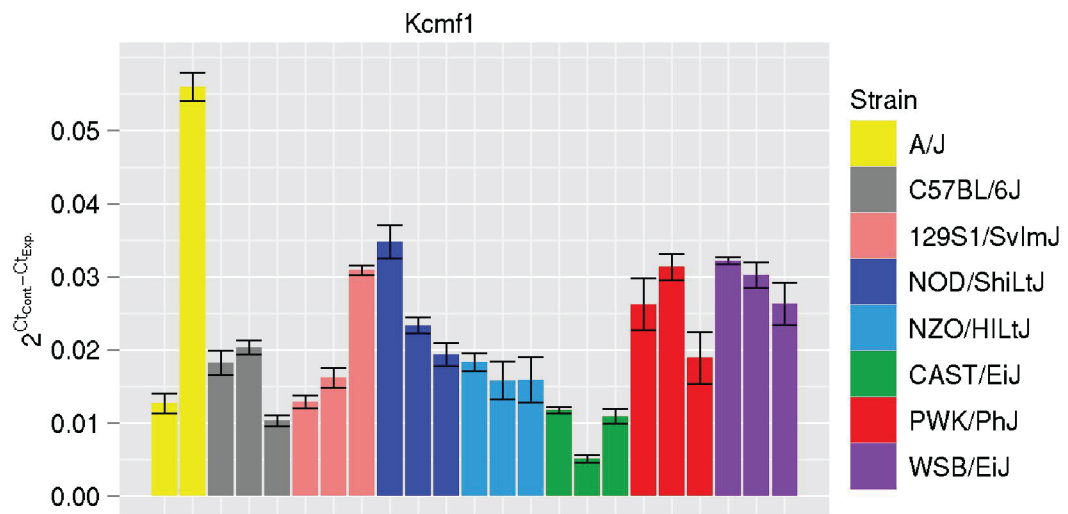

Figure S7

A.

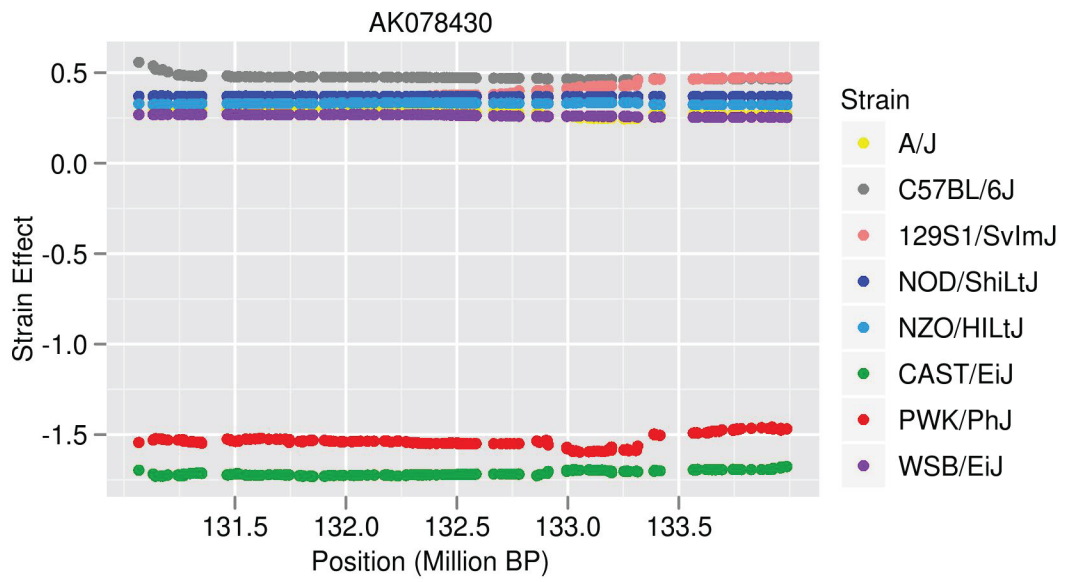

B.

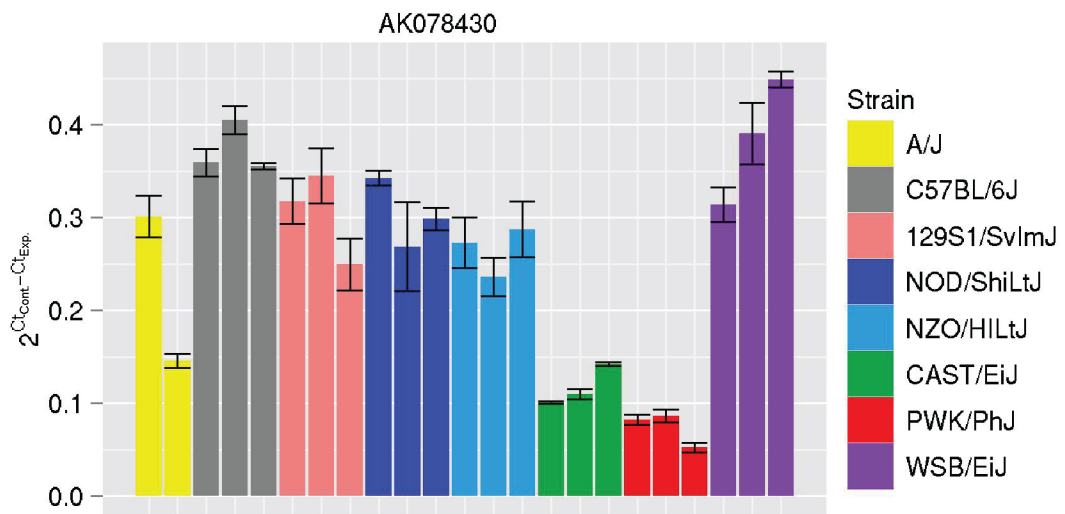

Figure S8



A.

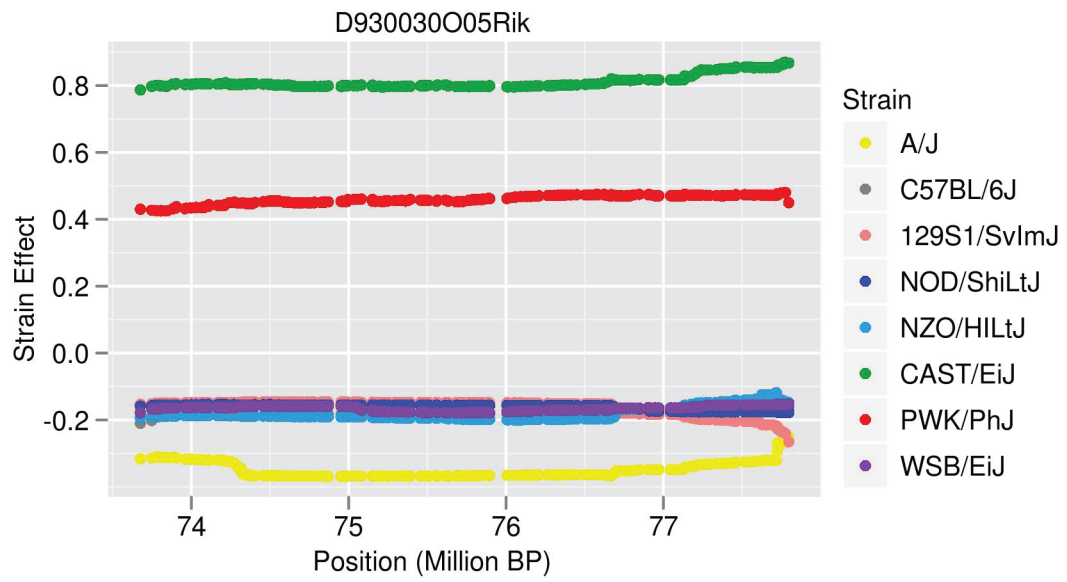

B.

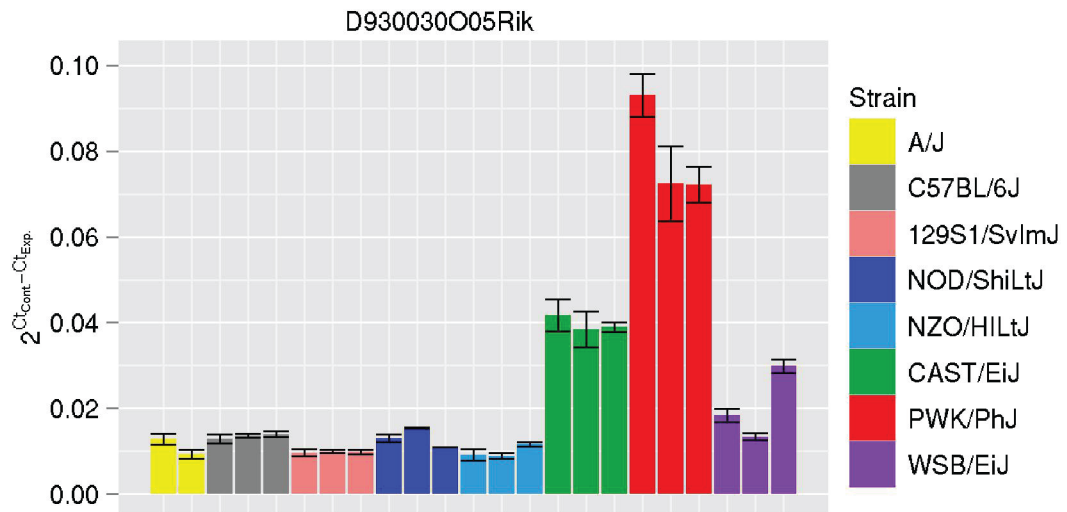

Figure S9

A.

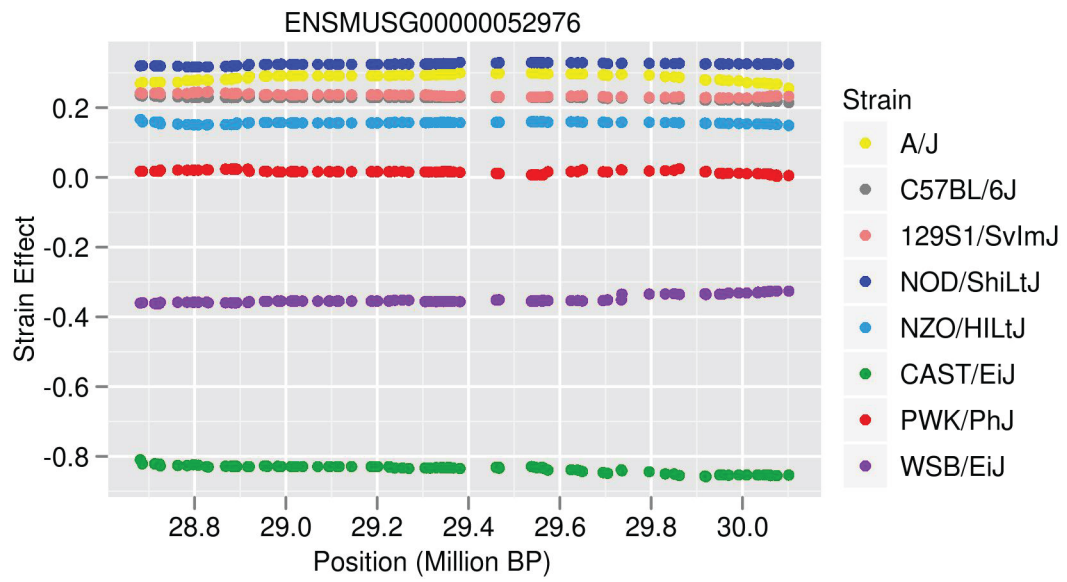

B.

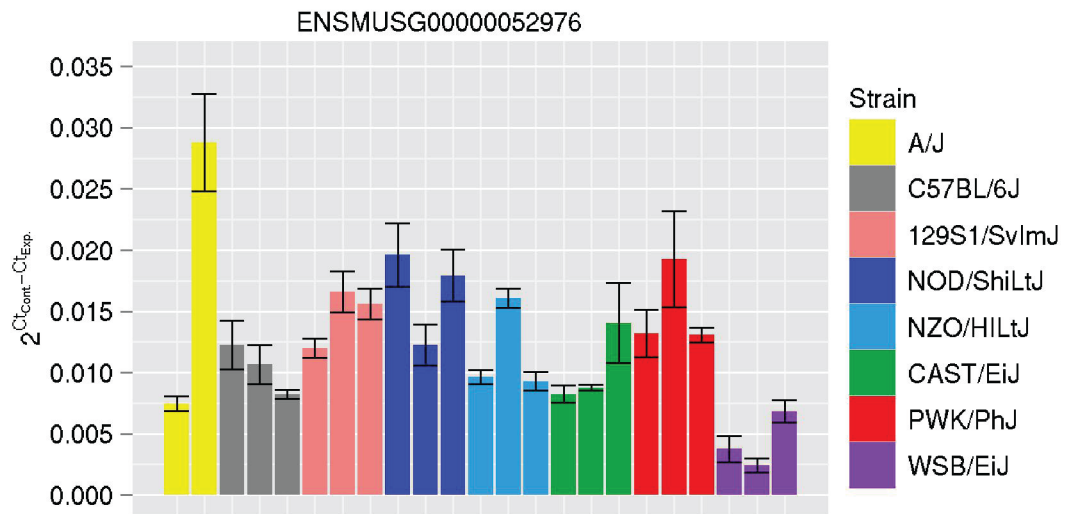

Figure S10

A.

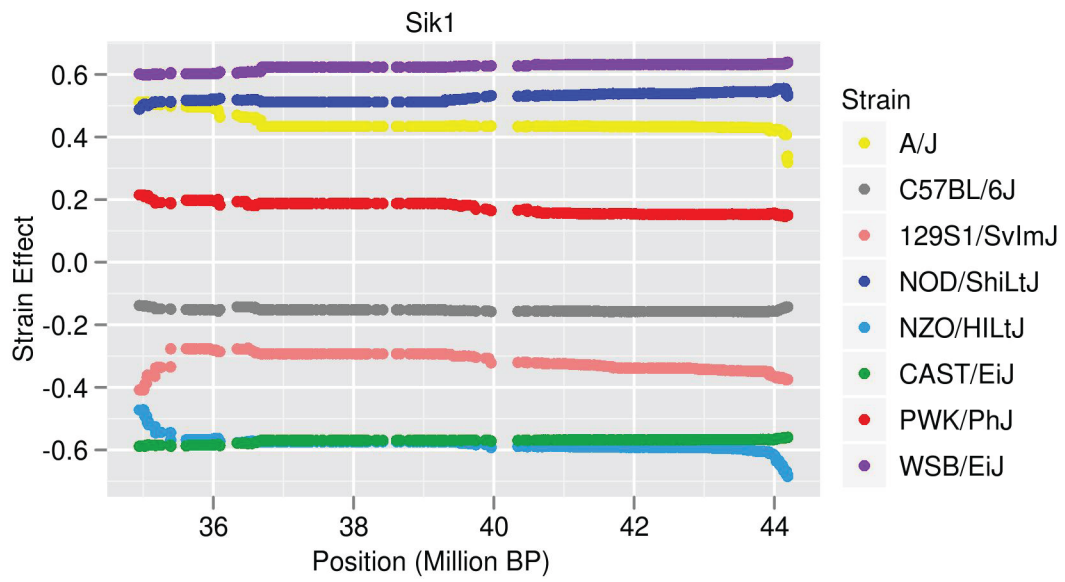

B.

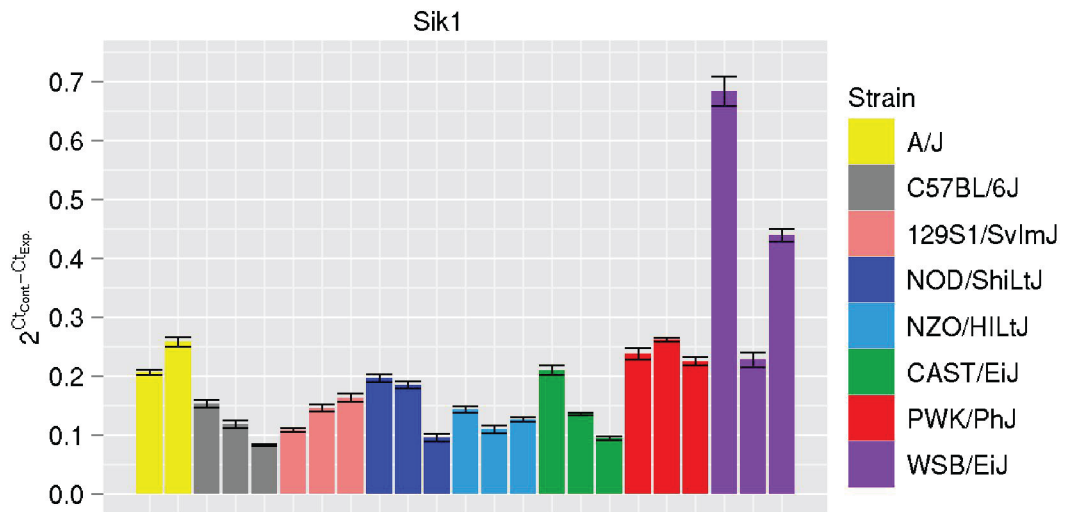

Figure S11

A.

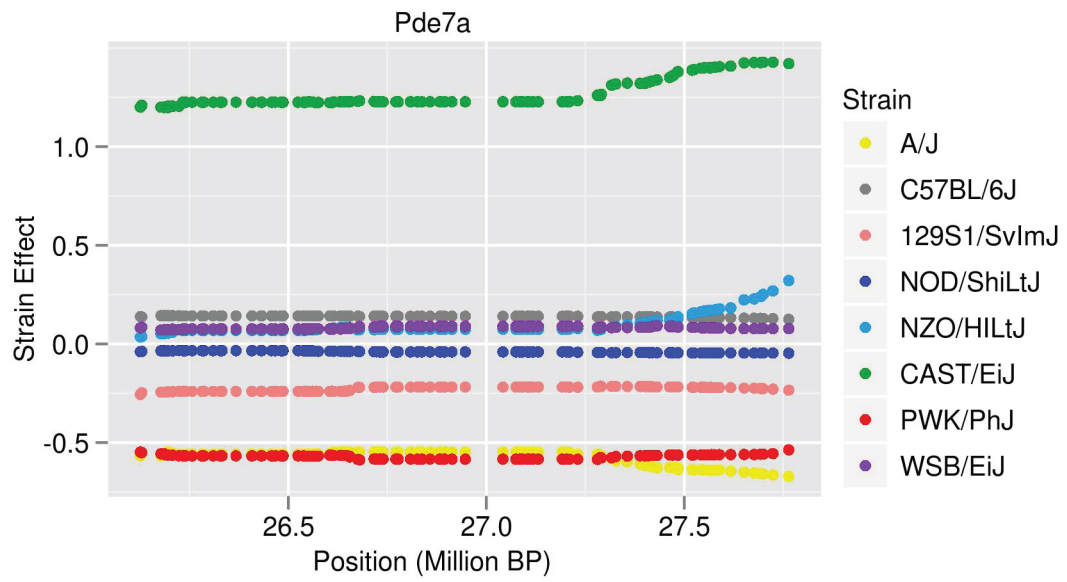

B.

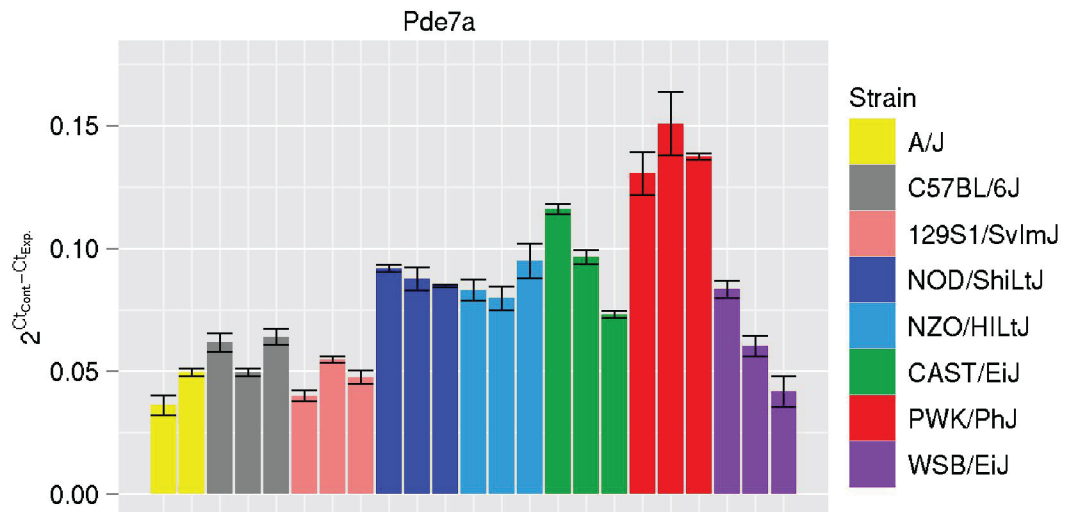

Figure S12

A.

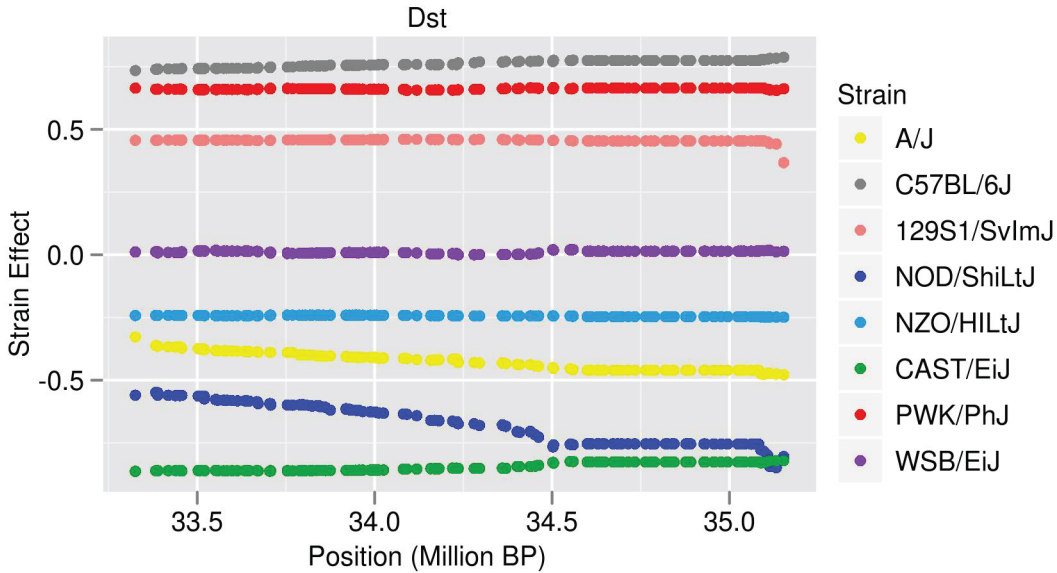

B.

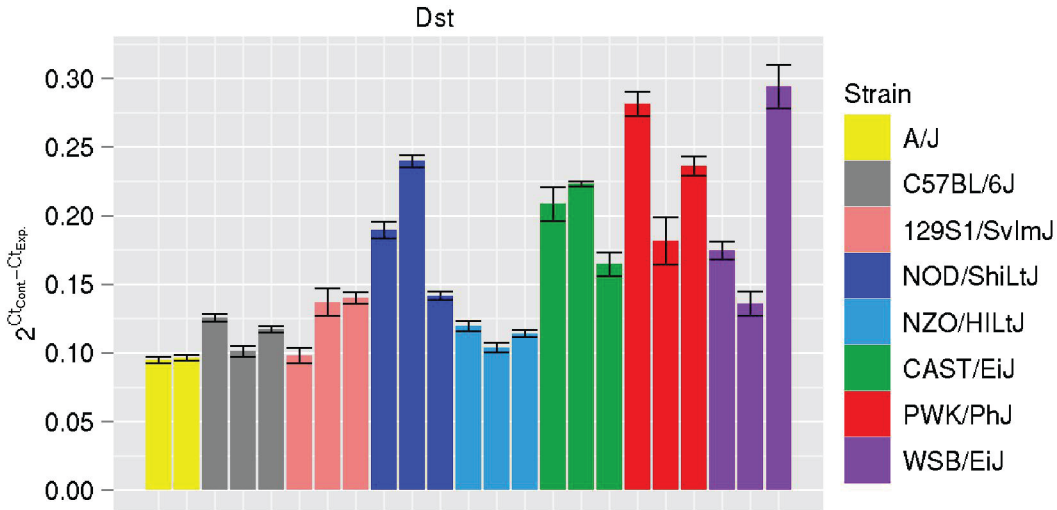

Figure S13

A.

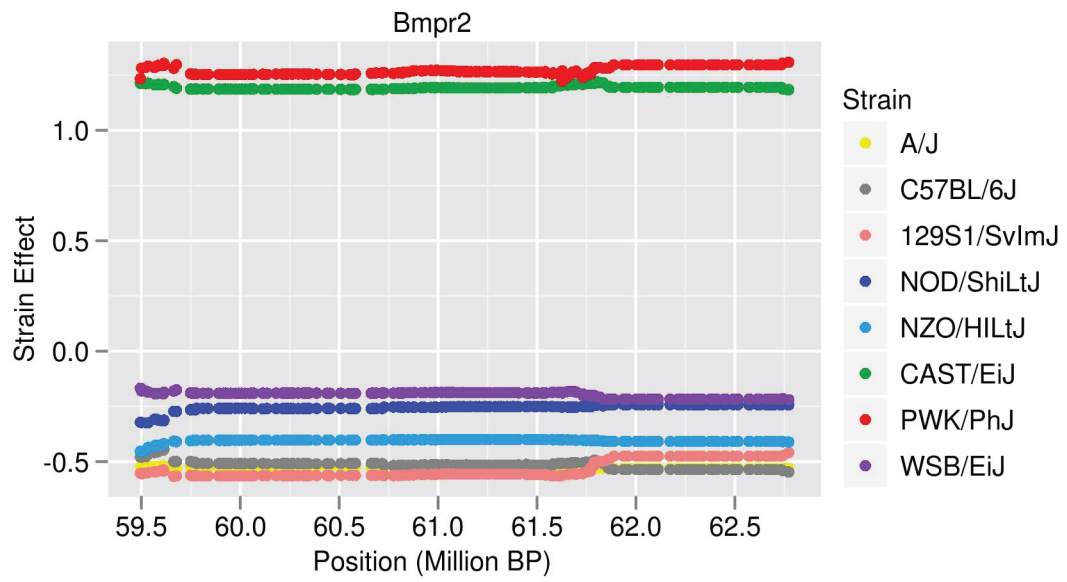

B.

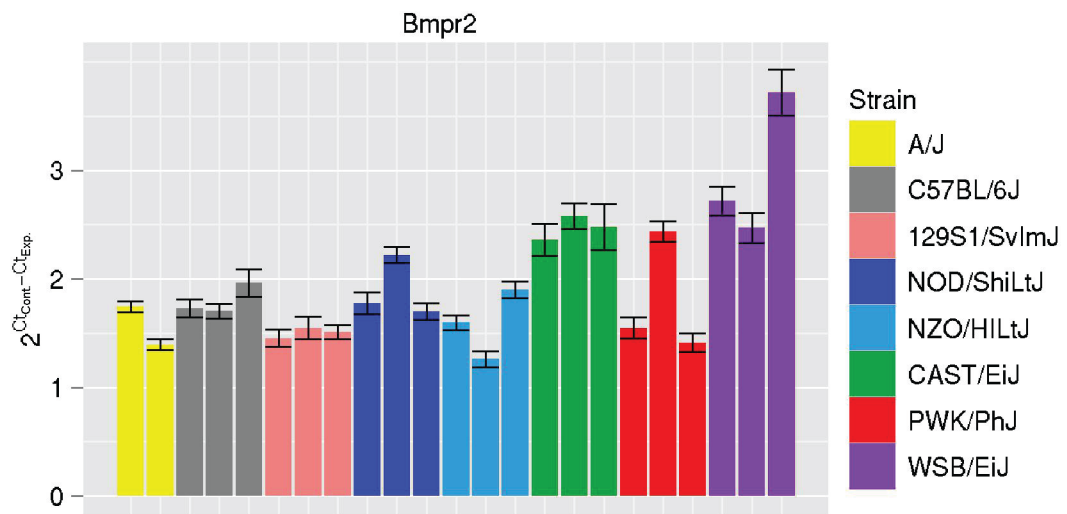

Figure S14

A.

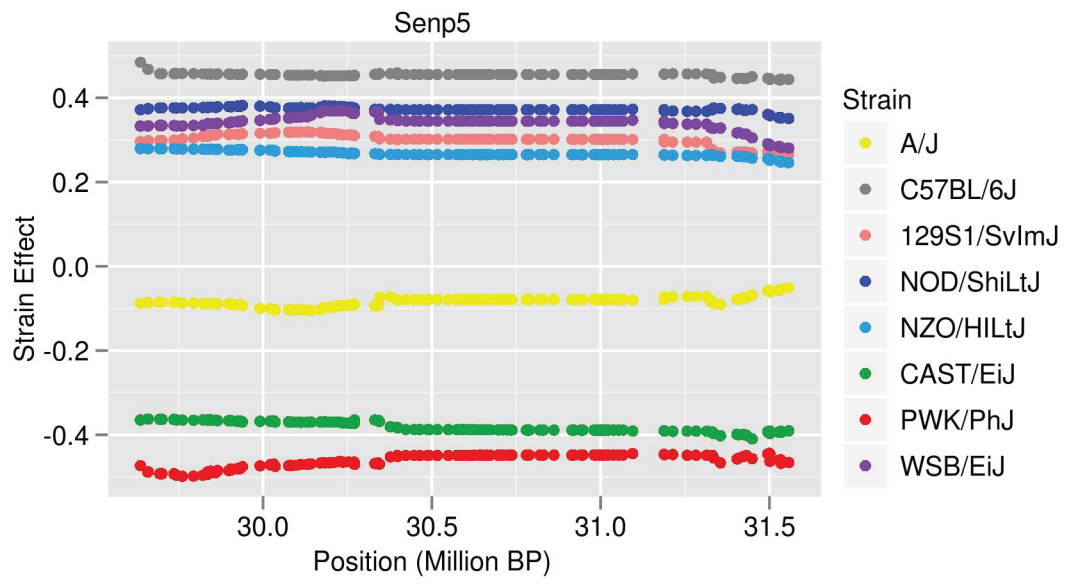

B.

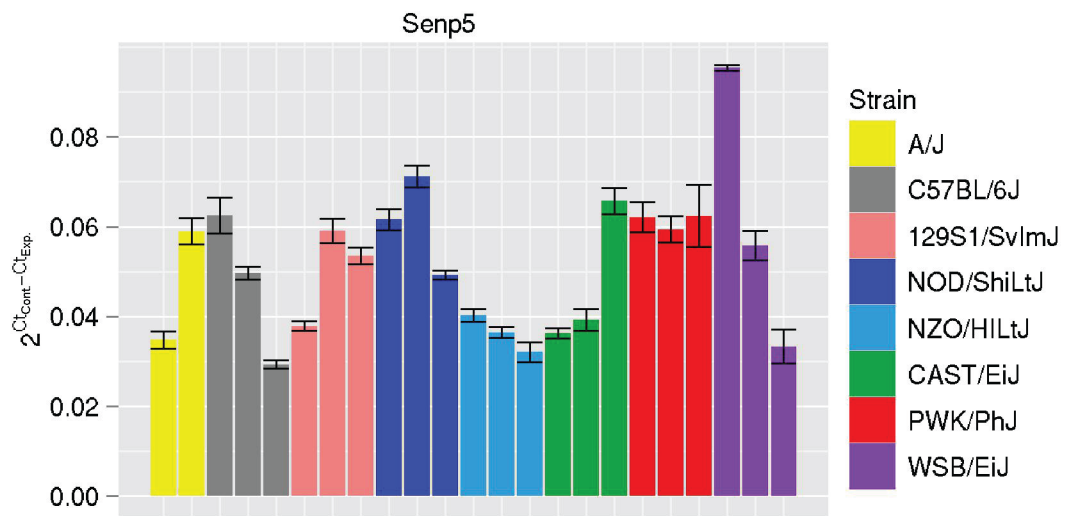

Figure S15

A.

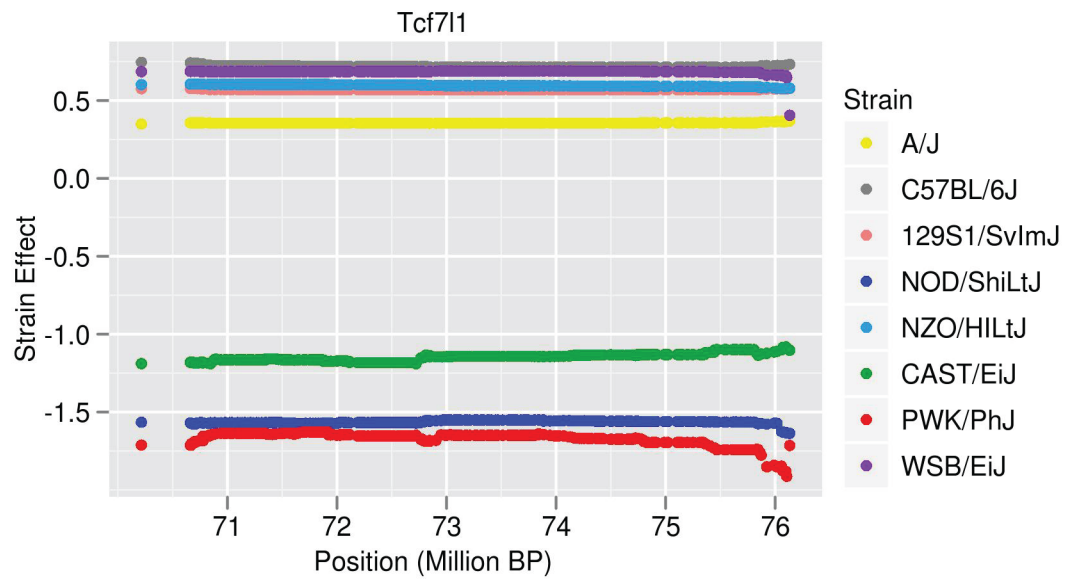

B.

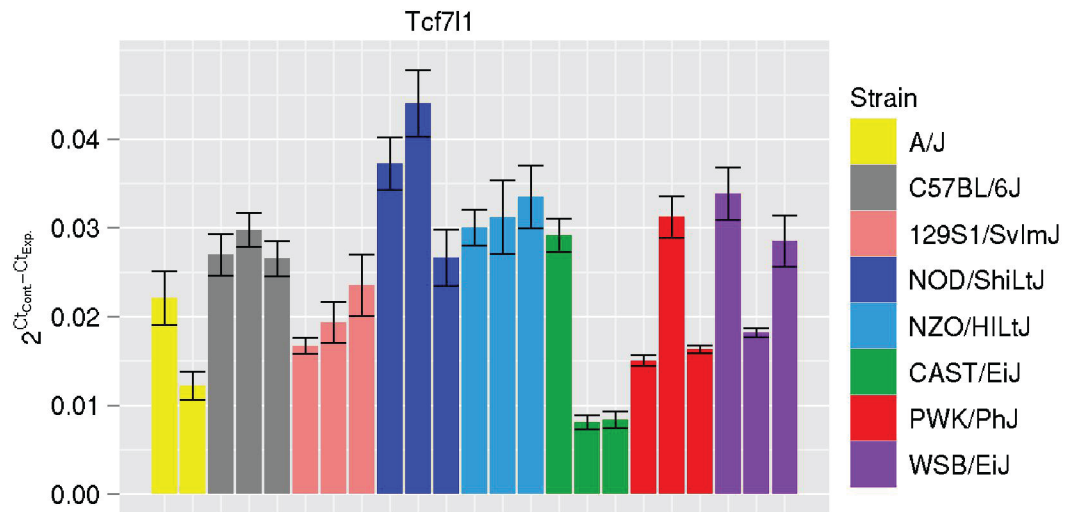

Figure S16



**Figure S1-S16 Allele effect and qPCR plots.** Allele effect and qPCR plots for the 7 remaining genes (Ifi2712a is shown in Figure 2) with allele effects completely consistent with the qPCR data are shown in Figures S1-S7. Similarly the partially consistent genes are shown in Figures S8-S11 and those that failed to confirm are shown in Figures S12-16. All figures are divided into two parts: (A) Displays the allele effects (Aylor *et al.* 2011) for each marker in the 1.5 LOD drop support interval. This was done for each gene with a significant eQTL and is shown with the values colored by inbred founder strain. (B) Displays the barplots of the endogenous control corrected qPCR Ct data generated for each of the mice derived from the indicated inbred strain. The error bars indicate the standard error. The gene being regulated by the eQTL is indicated above both plots.

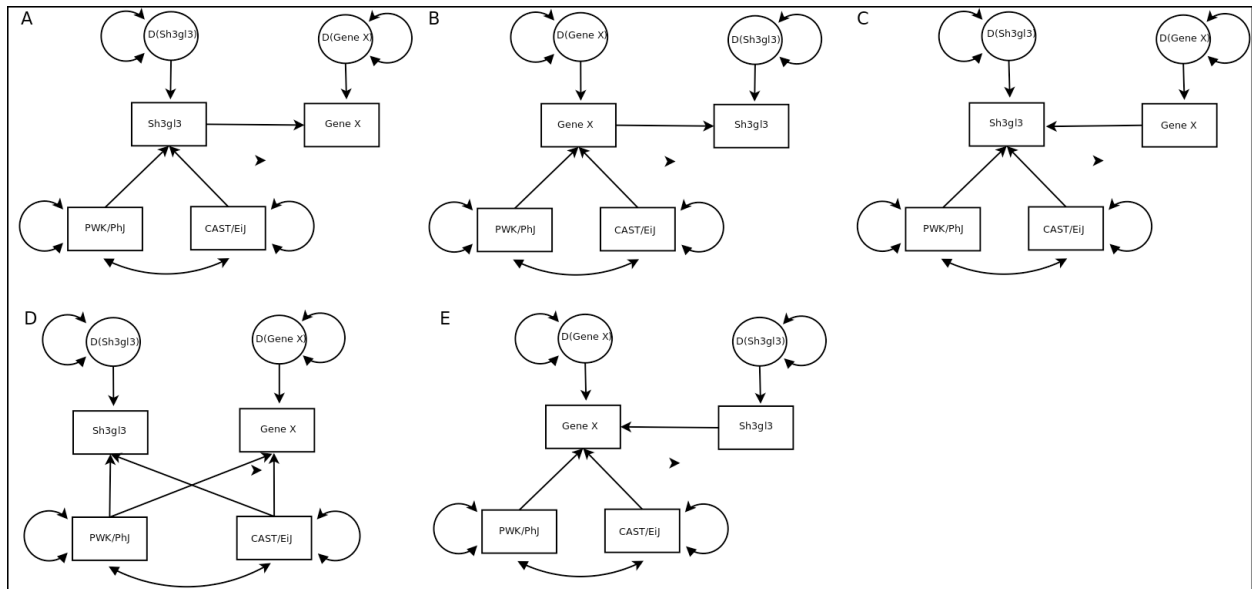

**Figure S17** An example of the path model diagrams for the 5 specified structural equation models. Shown in RAM notation are the 5 path models for the *Sh3gl3* gene and its relevant allelic contributions from PWK/PhJ and CAST/EiJ which were selected by forward variable selection. Our interest was in comparing model A against B-E. Gene X in this case represents a given gene from all the genes in the LRI group. The boxes represent variables and the single-headed arrows represent relationships (direct effects). The double-headed arrows represent variance and covariance depending on whether they are pointed at themselves or other variables respectively. Circles are disturbances (also indicated by D(variable name)). Disturbances represent variance unexplained by the model.

**Files S1-S9**

**Supporting Data**

Files S1-S9 are available for download at <http://www.g3journal.org/lookup/suppl/doi:10.1534/g3.111.001800/-/DC1>.

**Table S1 Enriched GO terms for up-regulated genes in each extreme phenotypic group**

Both the Gene Ontology term (GO Term) and the Benjamini and Yekutieli (Benjamini and Yekutieli, 2001) false discovery rate (BY FDR) are shown for the genes that were up-regulated in the high and low response to infection groups. Only FDR values < .01 were kept here.

Table S1 is available for download as a csv file at <http://www.g3journal.org/lookup/suppl/doi:10.1534/g3.111.001800/-/DC1>.

**Table S2 Strain contributions chosen by forward variable selection**

| Gene Name | Selected Strains | Allele effects |
|-----------|------------------|----------------|
| LOC675467 | G,C,F,G          | G,C            |
| Ifi2712a  | G                | G              |
| Thnsl2    | G,D,A,G          | G,D            |
| AK153595  | G,D,F            | G,D            |
| BC022687  | C,D,B,A          | B,D,C          |
| Sh3gl3    | G,F              | F,G            |
| Clec16a   | B,E,F            | B              |
| Kcmf1     | F,H,B,D,G        | F              |

Forward variable selection was used on the expected haplotype contributions to choose the most informative variables to include in the SEM models. The actual strain contributions chosen are shown in the “Selected Strains” column along with the smallest allele effect group in the “Allele effects” column. The letters correspond to strains in the following manner: A (A/J), B (C57BL/6J), C (129S1/SvImJ), D (NOD/ShiLtJ), E (NZO/HiLtJ), F (CAST/EiJ), G (PWK/PhJ) and H (WSB/EiJ).

**Table S3 Local SEM inferred causal relationships**

Each of the eight validated genes ("From" column) were examined relative to all the other genes ("To" column) in their respective groups (HRI or LRI). The most significant marker interval was determined for each of the eight genes and the strain contributions for each was picked using forward variable selection. Five SEM models were fit comparing the possible relationships between the selected strains for a given marker interval and the genes (Aten *et al.* 2008). Several values were computed including the NB Score which is the model P-value ("Model P" column) divided by the next highest model P-value and log10 transformed. Other fit comparison measures are also shown, the RMSEA, SRMSR, CFI along with the Wald P-value. Only those gene relationships that had a score > 1, model P-value > .05, RMSEA score < .05, SRMSR < .1, CFI > .9 and Wald P-value < .05 were kept.

Table S3 is available for download as a csv file at <http://www.g3journal.org/lookup/suppl/doi:10.1534/g3.111.001800/-/DC1>.

**Table S4 GO Categories for the genes reactive to Ifi2712a , Sh3gl3 and Kcmf1**

| GO Term                                                 | P-value |
|---------------------------------------------------------|---------|
| A. Ifi2712a                                             |         |
| transition metal ion transport                          | 0.001   |
| protein import into nucleus, translocation              | 0.002   |
| iron ion transport                                      | 0.004   |
| protein import into nucleus                             | 0.006   |
| regulation of endocytosis                               | 0.006   |
| positive regulation of endocytosis                      | 0.006   |
| regulation of phagocytosis                              | 0.006   |
| positive regulation of phagocytosis                     | 0.006   |
| nuclear import                                          | 0.006   |
| metal ion transport                                     | 0.008   |
| protein targeting                                       | 0.009   |
| protein import                                          | 0.009   |
| protein localization in nucleus                         | 0.009   |
| negative regulation of multicellular organismal process | 0.009   |
| cation transport                                        | 0.009   |
| nucleocytoplasmic transport                             | 0.012   |
| nuclear transport                                       | 0.012   |
| protein localization in organelle                       | 0.015   |
| regulation of vesicle-mediated transport                | 0.015   |
| B. Sh3gl3                                               |         |
| multicellular organismal process                        | 0       |
| regulation of multicellular organismal process          | 0       |
| mesoderm development                                    | 0.003   |
| multicellular organismal development                    | 0.004   |
| cell migration                                          | 0.004   |
| regulation of developmental process                     | 0.004   |
| negative regulation of cell growth                      | 0.004   |
| negative regulation of cell size                        | 0.004   |
| cellular component movement                             | 0.005   |
| patterning of blood vessels                             | 0.006   |
| olfactory bulb development                              | 0.006   |
| olfactory lobe development                              | 0.006   |
| retinal ganglion cell axon guidance                     | 0.006   |
| positive regulation of protein binding                  | 0.006   |

|                                                          |       |
|----------------------------------------------------------|-------|
| regulation of protein binding                            | 0.006 |
| locomotion                                               | 0.007 |
| anatomical structure formation involved in morphogenesis | 0.007 |
| establishment of protein localization                    | 0.007 |
| formation of primary germ layer                          | 0.008 |
| mesoderm formation                                       | 0.008 |
| <hr/>                                                    |       |
| C. <i>Kcmf1</i>                                          |       |
| <hr/>                                                    |       |
| cholesterol metabolic process                            | 0.007 |
| sterol metabolic process                                 | 0.007 |
| steroid metabolic process                                | 0.010 |
| response to radiation                                    | 0.020 |
| arginine metabolic process                               | 0.023 |
| xenobiotic metabolic process                             | 0.023 |
| membrane budding                                         | 0.023 |
| vesicle coating                                          | 0.023 |
| striated muscle contraction                              | 0.023 |
| response to xenobiotic stimulus                          | 0.023 |
| coenzyme A metabolic process                             | 0.023 |
| dendrite development                                     | 0.023 |
| cytidine to uridine editing                              | 0.023 |
| mRNA modification                                        | 0.023 |
| protein sumoylation                                      | 0.023 |
| regulation of protein sumoylation                        | 0.023 |
| positive regulation of protein sumoylation               | 0.023 |
| nucleoside bisphosphate metabolic process                | 0.023 |
| lipoprotein transport                                    | 0.023 |
| <hr/>                                                    |       |

The genes reactive to either *Ifi2712a* (A) or *Sh3gl3* (B) or *Kcmf1* (C) were entered into a GO analysis focusing on overrepresentation of biological process terms. Shown are the top 20 GO terms and their P-values for all tables.



#### LITERATURE CITED

Aten, J., T. Fuller, A. Lusi and S. Horvath, 2008 Using genetic markers to orient the edges in quantitative trait networks: The NEO software. *BMC Systems Biology* **2**: 34.

Aylor, D. L., W. Valdar, W. Foulds-Mathes, R. J. Buus, R. A. Verdugo *et al*, 2011 Genetic analysis of complex traits in the emerging collaborative cross. *Genome Research* .

Benjamini, Y., and D. Yekutieli, 2001 The control of the false discovery rate in multiple testing under dependency. *The Annals of Statistics* **29**: 1165-1188.
