# Supplementary material for: Expression Quantitative Trait Loci for Extreme Host Response to Influenza A in Pre-Collaborative Cross Mice
Source: PubMed Central journal article supplement (PMC3284329; doi:10.1534/g3.111.001800), 2012-02-01
Supplement: supp_2.2.213_FigureS2.pdf [file supp_2.2.213_FigureS2.pdf]

A.

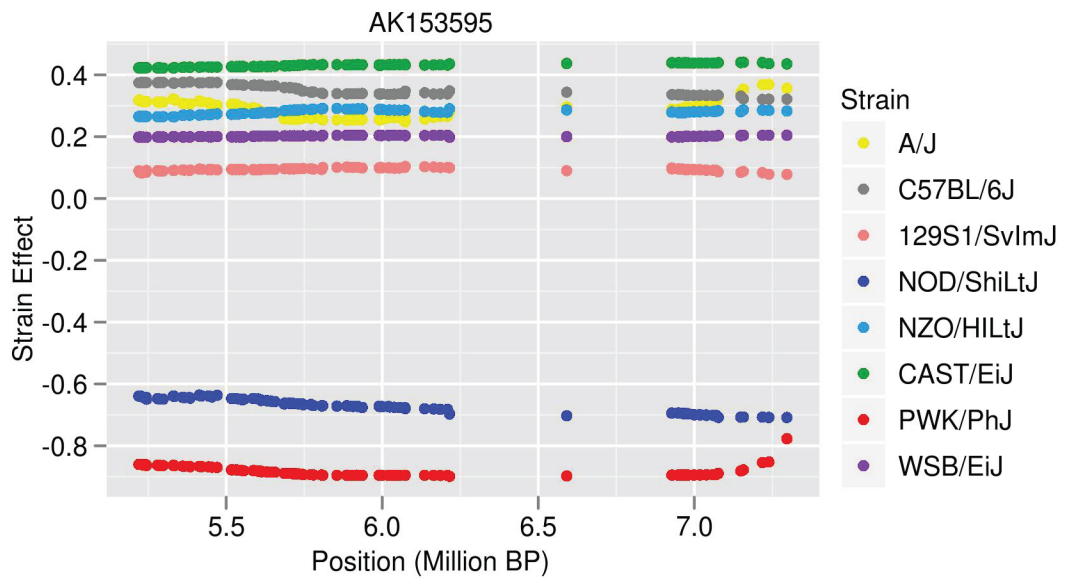

B.

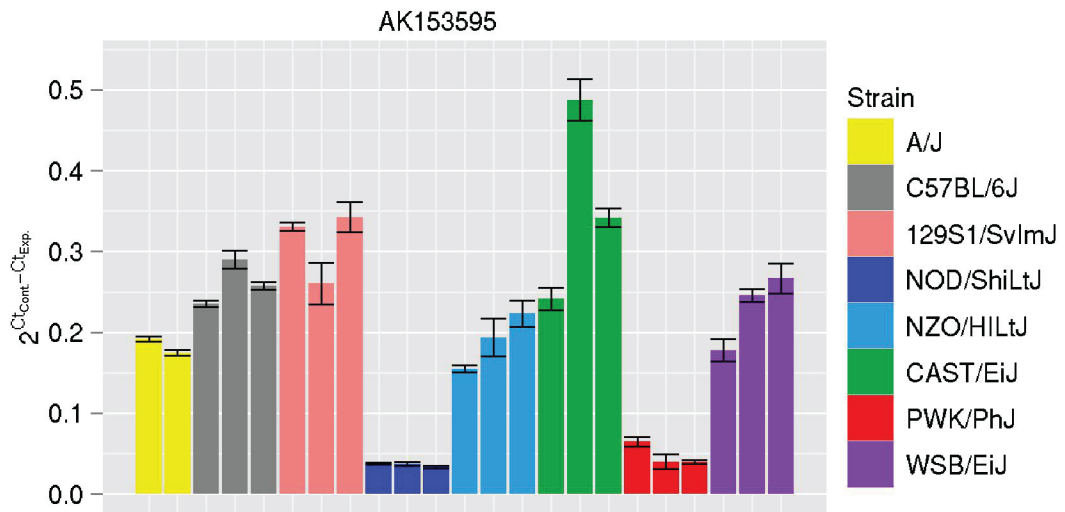

Figure S2
