# Supplementary material for: Expression Quantitative Trait Loci for Extreme Host Response to Influenza A in Pre-Collaborative Cross Mice
Source: PubMed Central journal article supplement (PMC3284329; doi:10.1534/g3.111.001800), 2012-02-01
Supplement: supp_2.2.213_TableS2.pdf [file supp_2.2.213_TableS2.pdf]

**Table S2 Strain contributions chosen by forward variable selection**

| Gene Name | Selected Strains | Allele effects |
|-----------|------------------|----------------|
| LOC675467 | G,C,F,G          | G,C            |
| Ifi2712a  | G                | G              |
| Thnsl2    | G,D,A,G          | G,D            |
| AK153595  | G,D,F            | G,D            |
| BC022687  | C,D,B,A          | B,D,C          |
| Sh3gl3    | G,F              | F,G            |
| Clec16a   | B,E,F            | B              |
| Kcmf1     | F,H,B,D,G        | F              |

Forward variable selection was used on the expected haplotype contributions to choose the most informative variables to include in the SEM models. The actual strain contributions chosen are shown in the “Selected Strains” column along with the smallest allele effect group in the “Allele effects” column. The letters correspond to strains in the following manner: A (A/J), B (C57BL/6J), C (129S1/SvImJ), D (NOD/ShiLtJ), E (NZO/HiLtJ), F (CAST/EiJ), G (PWK/PhJ) and H (WSB/EiJ).
