# Supplementary material for: Expression Quantitative Trait Loci for Extreme Host Response to Influenza A in Pre-Collaborative Cross Mice
Source: PubMed Central journal article supplement (PMC3284329; doi:10.1534/g3.111.001800), 2012-02-01
Supplement: supp_2.2.213_TableS4.pdf [file supp_2.2.213_TableS4.pdf]

**Table S4 GO Categories for the genes reactive to Ifi2712a , Sh3gl3 and Kcmf1**

| GO Term                                                 | P-value |
|---------------------------------------------------------|---------|
| A. Ifi2712a                                             |         |
| transition metal ion transport                          | 0.001   |
| protein import into nucleus, translocation              | 0.002   |
| iron ion transport                                      | 0.004   |
| protein import into nucleus                             | 0.006   |
| regulation of endocytosis                               | 0.006   |
| positive regulation of endocytosis                      | 0.006   |
| regulation of phagocytosis                              | 0.006   |
| positive regulation of phagocytosis                     | 0.006   |
| nuclear import                                          | 0.006   |
| metal ion transport                                     | 0.008   |
| protein targeting                                       | 0.009   |
| protein import                                          | 0.009   |
| protein localization in nucleus                         | 0.009   |
| negative regulation of multicellular organismal process | 0.009   |
| cation transport                                        | 0.009   |
| nucleocytoplasmic transport                             | 0.012   |
| nuclear transport                                       | 0.012   |
| protein localization in organelle                       | 0.015   |
| regulation of vesicle-mediated transport                | 0.015   |
| B. Sh3gl3                                               |         |
| multicellular organismal process                        | 0       |
| regulation of multicellular organismal process          | 0       |
| mesoderm development                                    | 0.003   |
| multicellular organismal development                    | 0.004   |
| cell migration                                          | 0.004   |
| regulation of developmental process                     | 0.004   |
| negative regulation of cell growth                      | 0.004   |
| negative regulation of cell size                        | 0.004   |
| cellular component movement                             | 0.005   |
| patterning of blood vessels                             | 0.006   |
| olfactory bulb development                              | 0.006   |
| olfactory lobe development                              | 0.006   |
| retinal ganglion cell axon guidance                     | 0.006   |
| positive regulation of protein binding                  | 0.006   |

|                                                          |       |
|----------------------------------------------------------|-------|
| regulation of protein binding                            | 0.006 |
| locomotion                                               | 0.007 |
| anatomical structure formation involved in morphogenesis | 0.007 |
| establishment of protein localization                    | 0.007 |
| formation of primary germ layer                          | 0.008 |
| mesoderm formation                                       | 0.008 |
| <hr/>                                                    |       |
| C. <i>Kcmf1</i>                                          |       |
| <hr/>                                                    |       |
| cholesterol metabolic process                            | 0.007 |
| sterol metabolic process                                 | 0.007 |
| steroid metabolic process                                | 0.010 |
| response to radiation                                    | 0.020 |
| arginine metabolic process                               | 0.023 |
| xenobiotic metabolic process                             | 0.023 |
| membrane budding                                         | 0.023 |
| vesicle coating                                          | 0.023 |
| striated muscle contraction                              | 0.023 |
| response to xenobiotic stimulus                          | 0.023 |
| coenzyme A metabolic process                             | 0.023 |
| dendrite development                                     | 0.023 |
| cytidine to uridine editing                              | 0.023 |
| mRNA modification                                        | 0.023 |
| protein sumoylation                                      | 0.023 |
| regulation of protein sumoylation                        | 0.023 |
| positive regulation of protein sumoylation               | 0.023 |
| nucleoside bisphosphate metabolic process                | 0.023 |
| lipoprotein transport                                    | 0.023 |
| <hr/>                                                    |       |

The genes reactive to either *Ifi2712a* (A) or *Sh3gl3* (B) or *Kcmf1* (C) were entered into a GO analysis focusing on overrepresentation of biological process terms. Shown are the top 20 GO terms and their P-values for all tables.
